# Supplementary material for: Ingenuity Pathway Analysis of Gene Expression Profiles in Distal Nerve Stump following Nerve Injury: Insights into Wallerian Degeneration
Source: PubMed Central journal article supplement (PMC5138191; doi:10.3389/fncel.2016.00274), 2016-12-06

0.5 hour

Extracellular Space

CXCL3

IL6

BTC

Plasma Membrane

SLC9A1\*

Cytoplasm

Nucleus

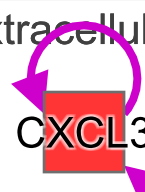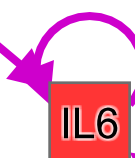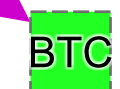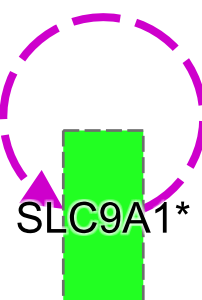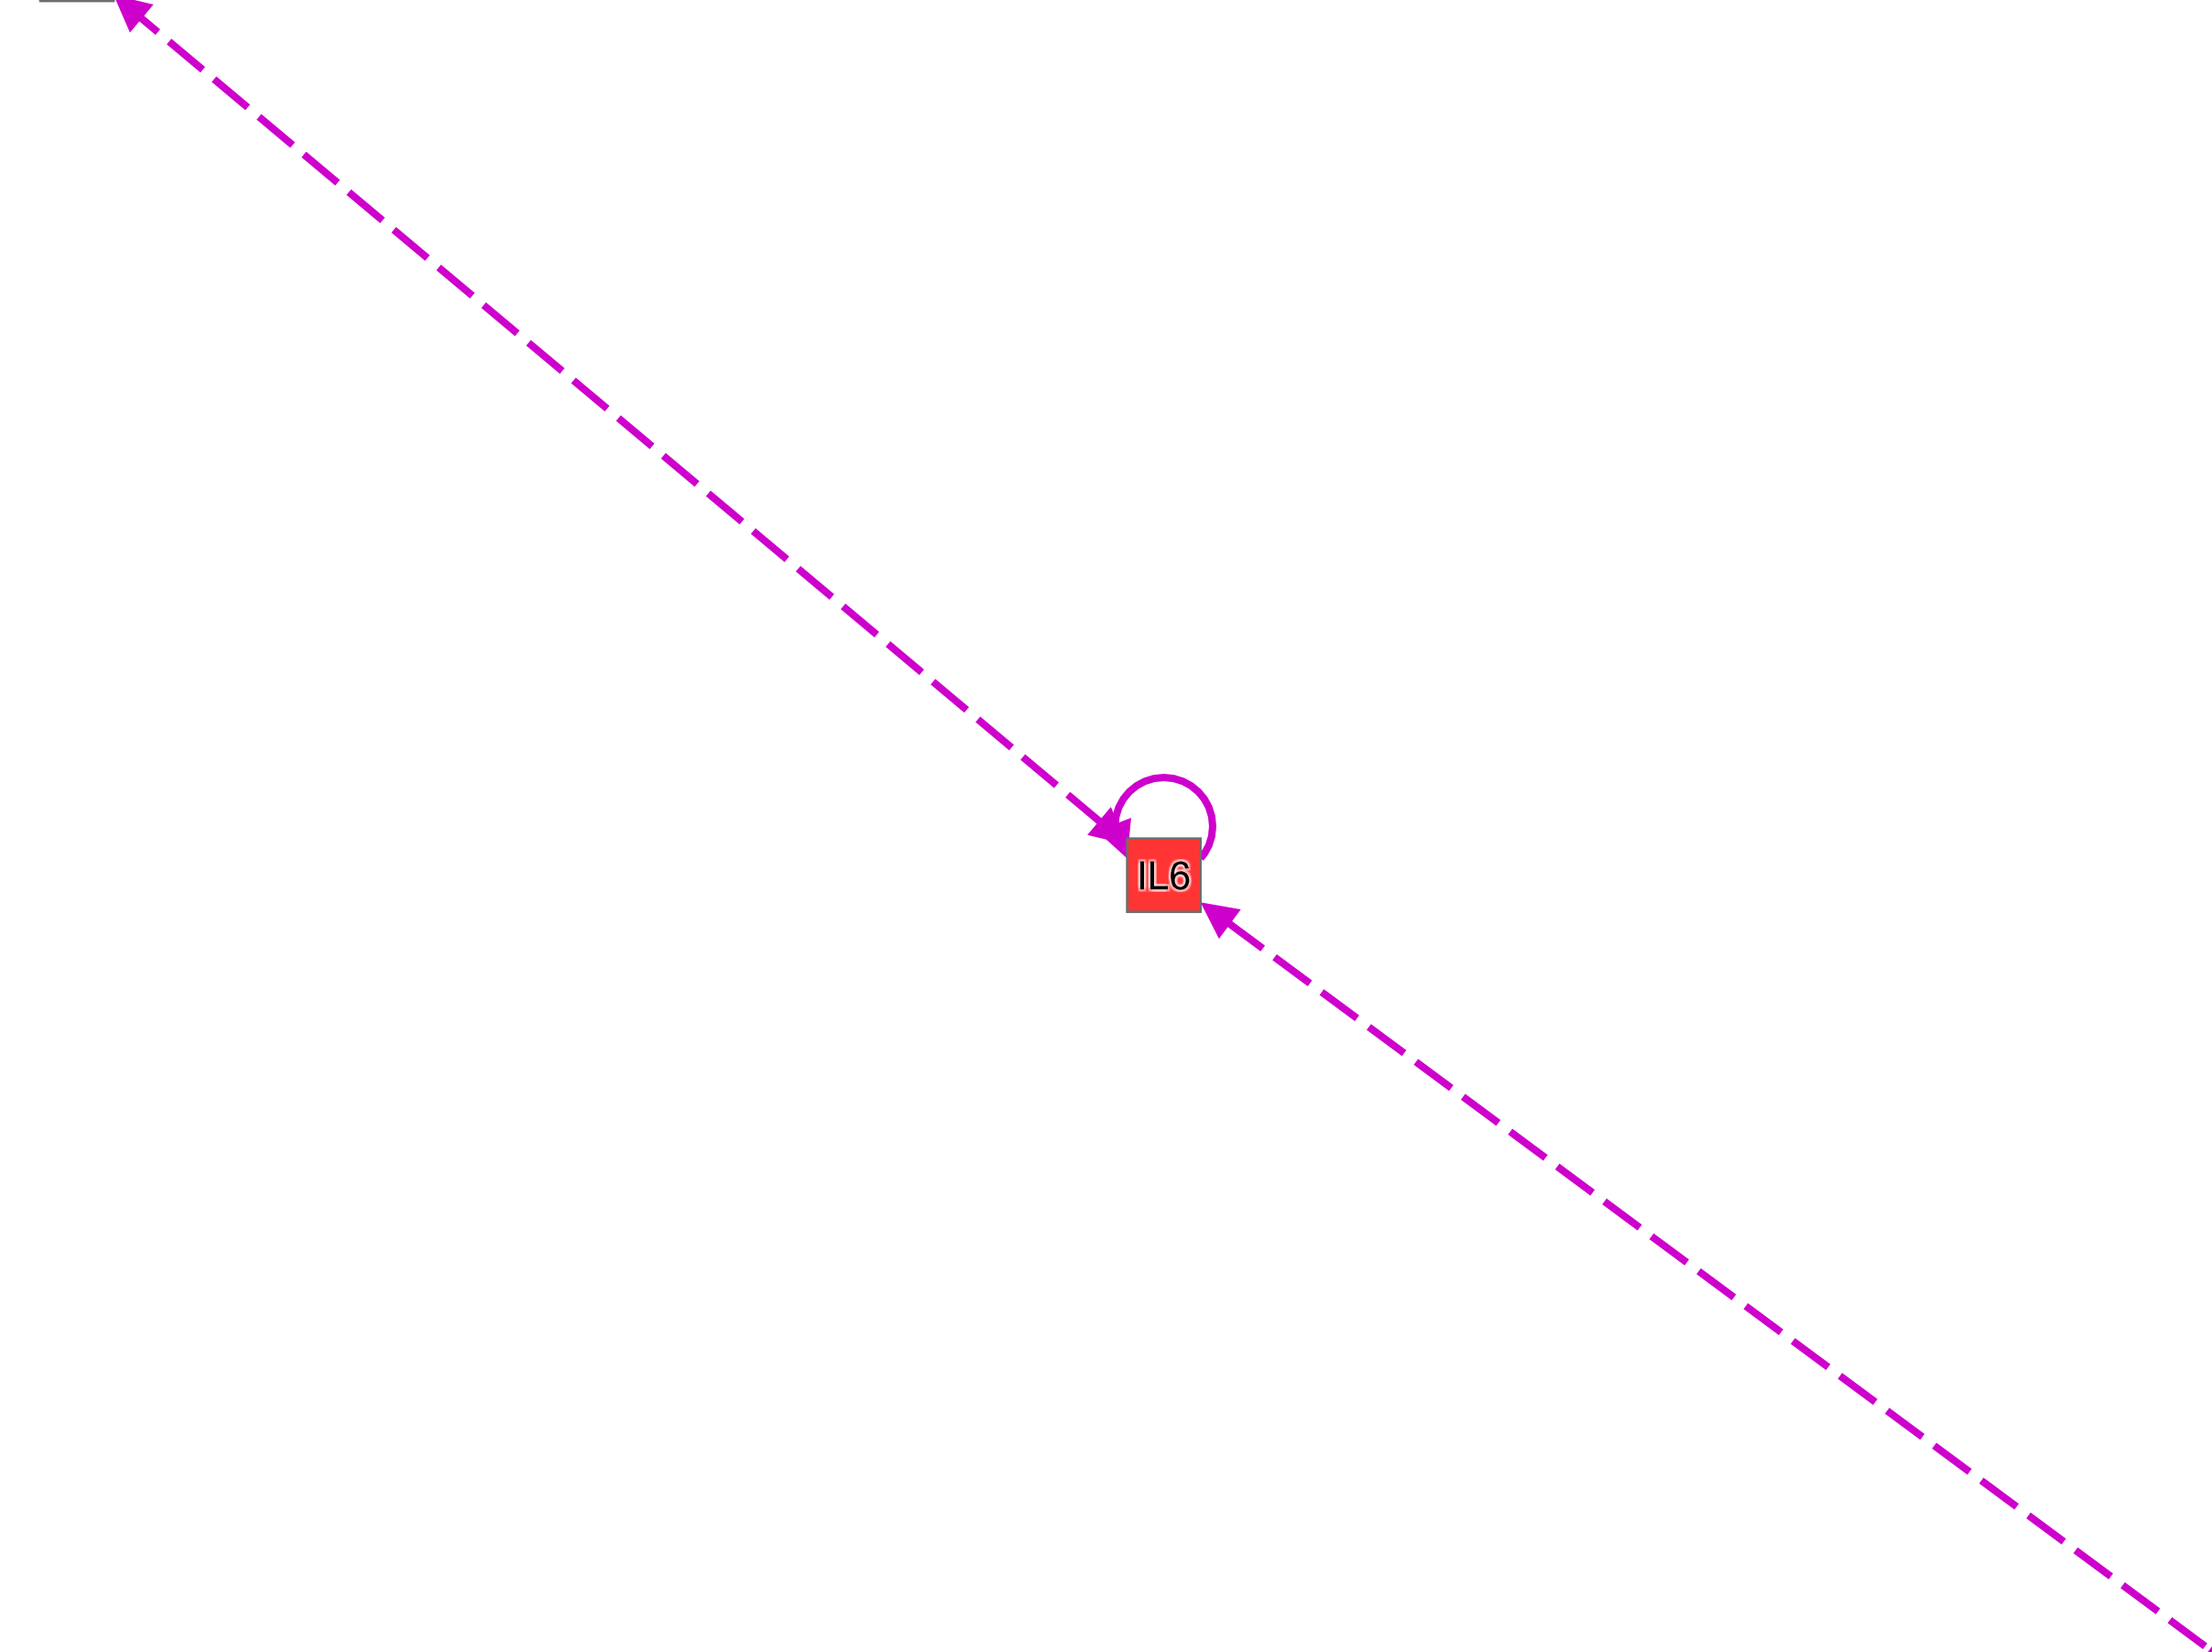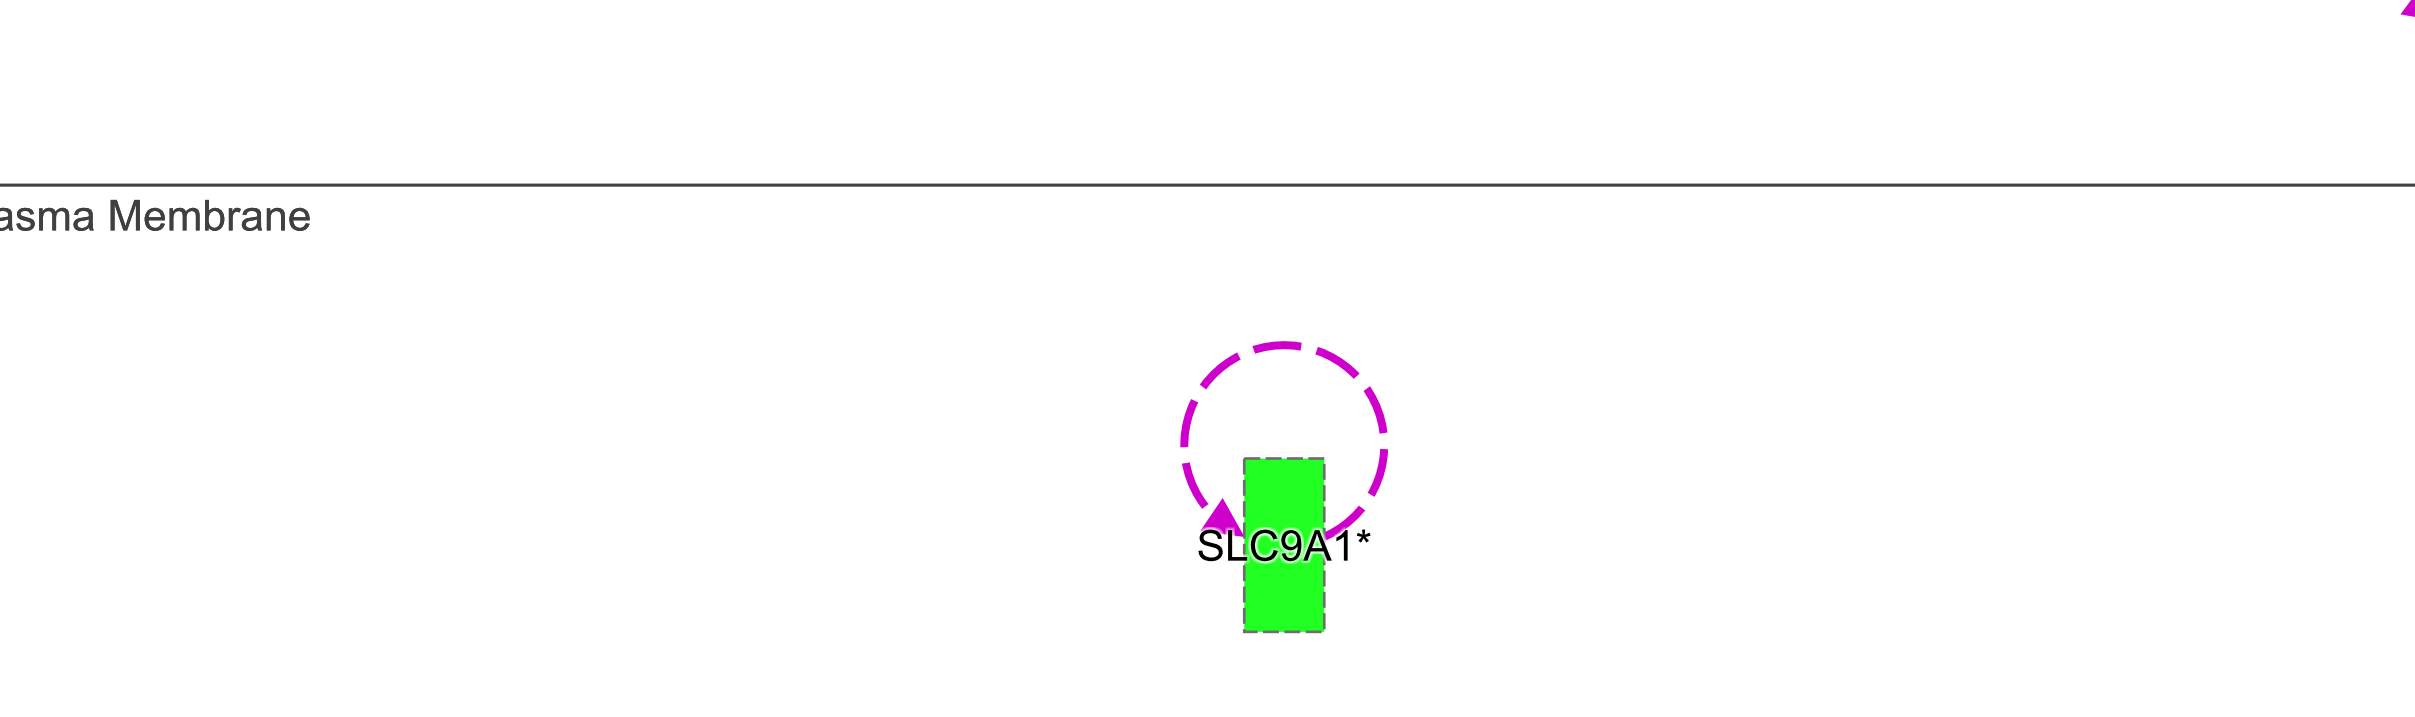

1 hour

Extracellular Space

CSF2\*

IL6

Plasma Membrane

PLAUR\*

EPHA4\*

Cytoplasm

Nucleus

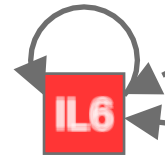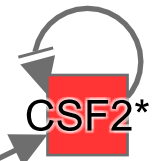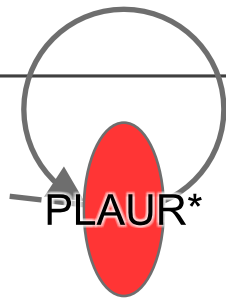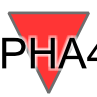

6 hours

Extracellular Space

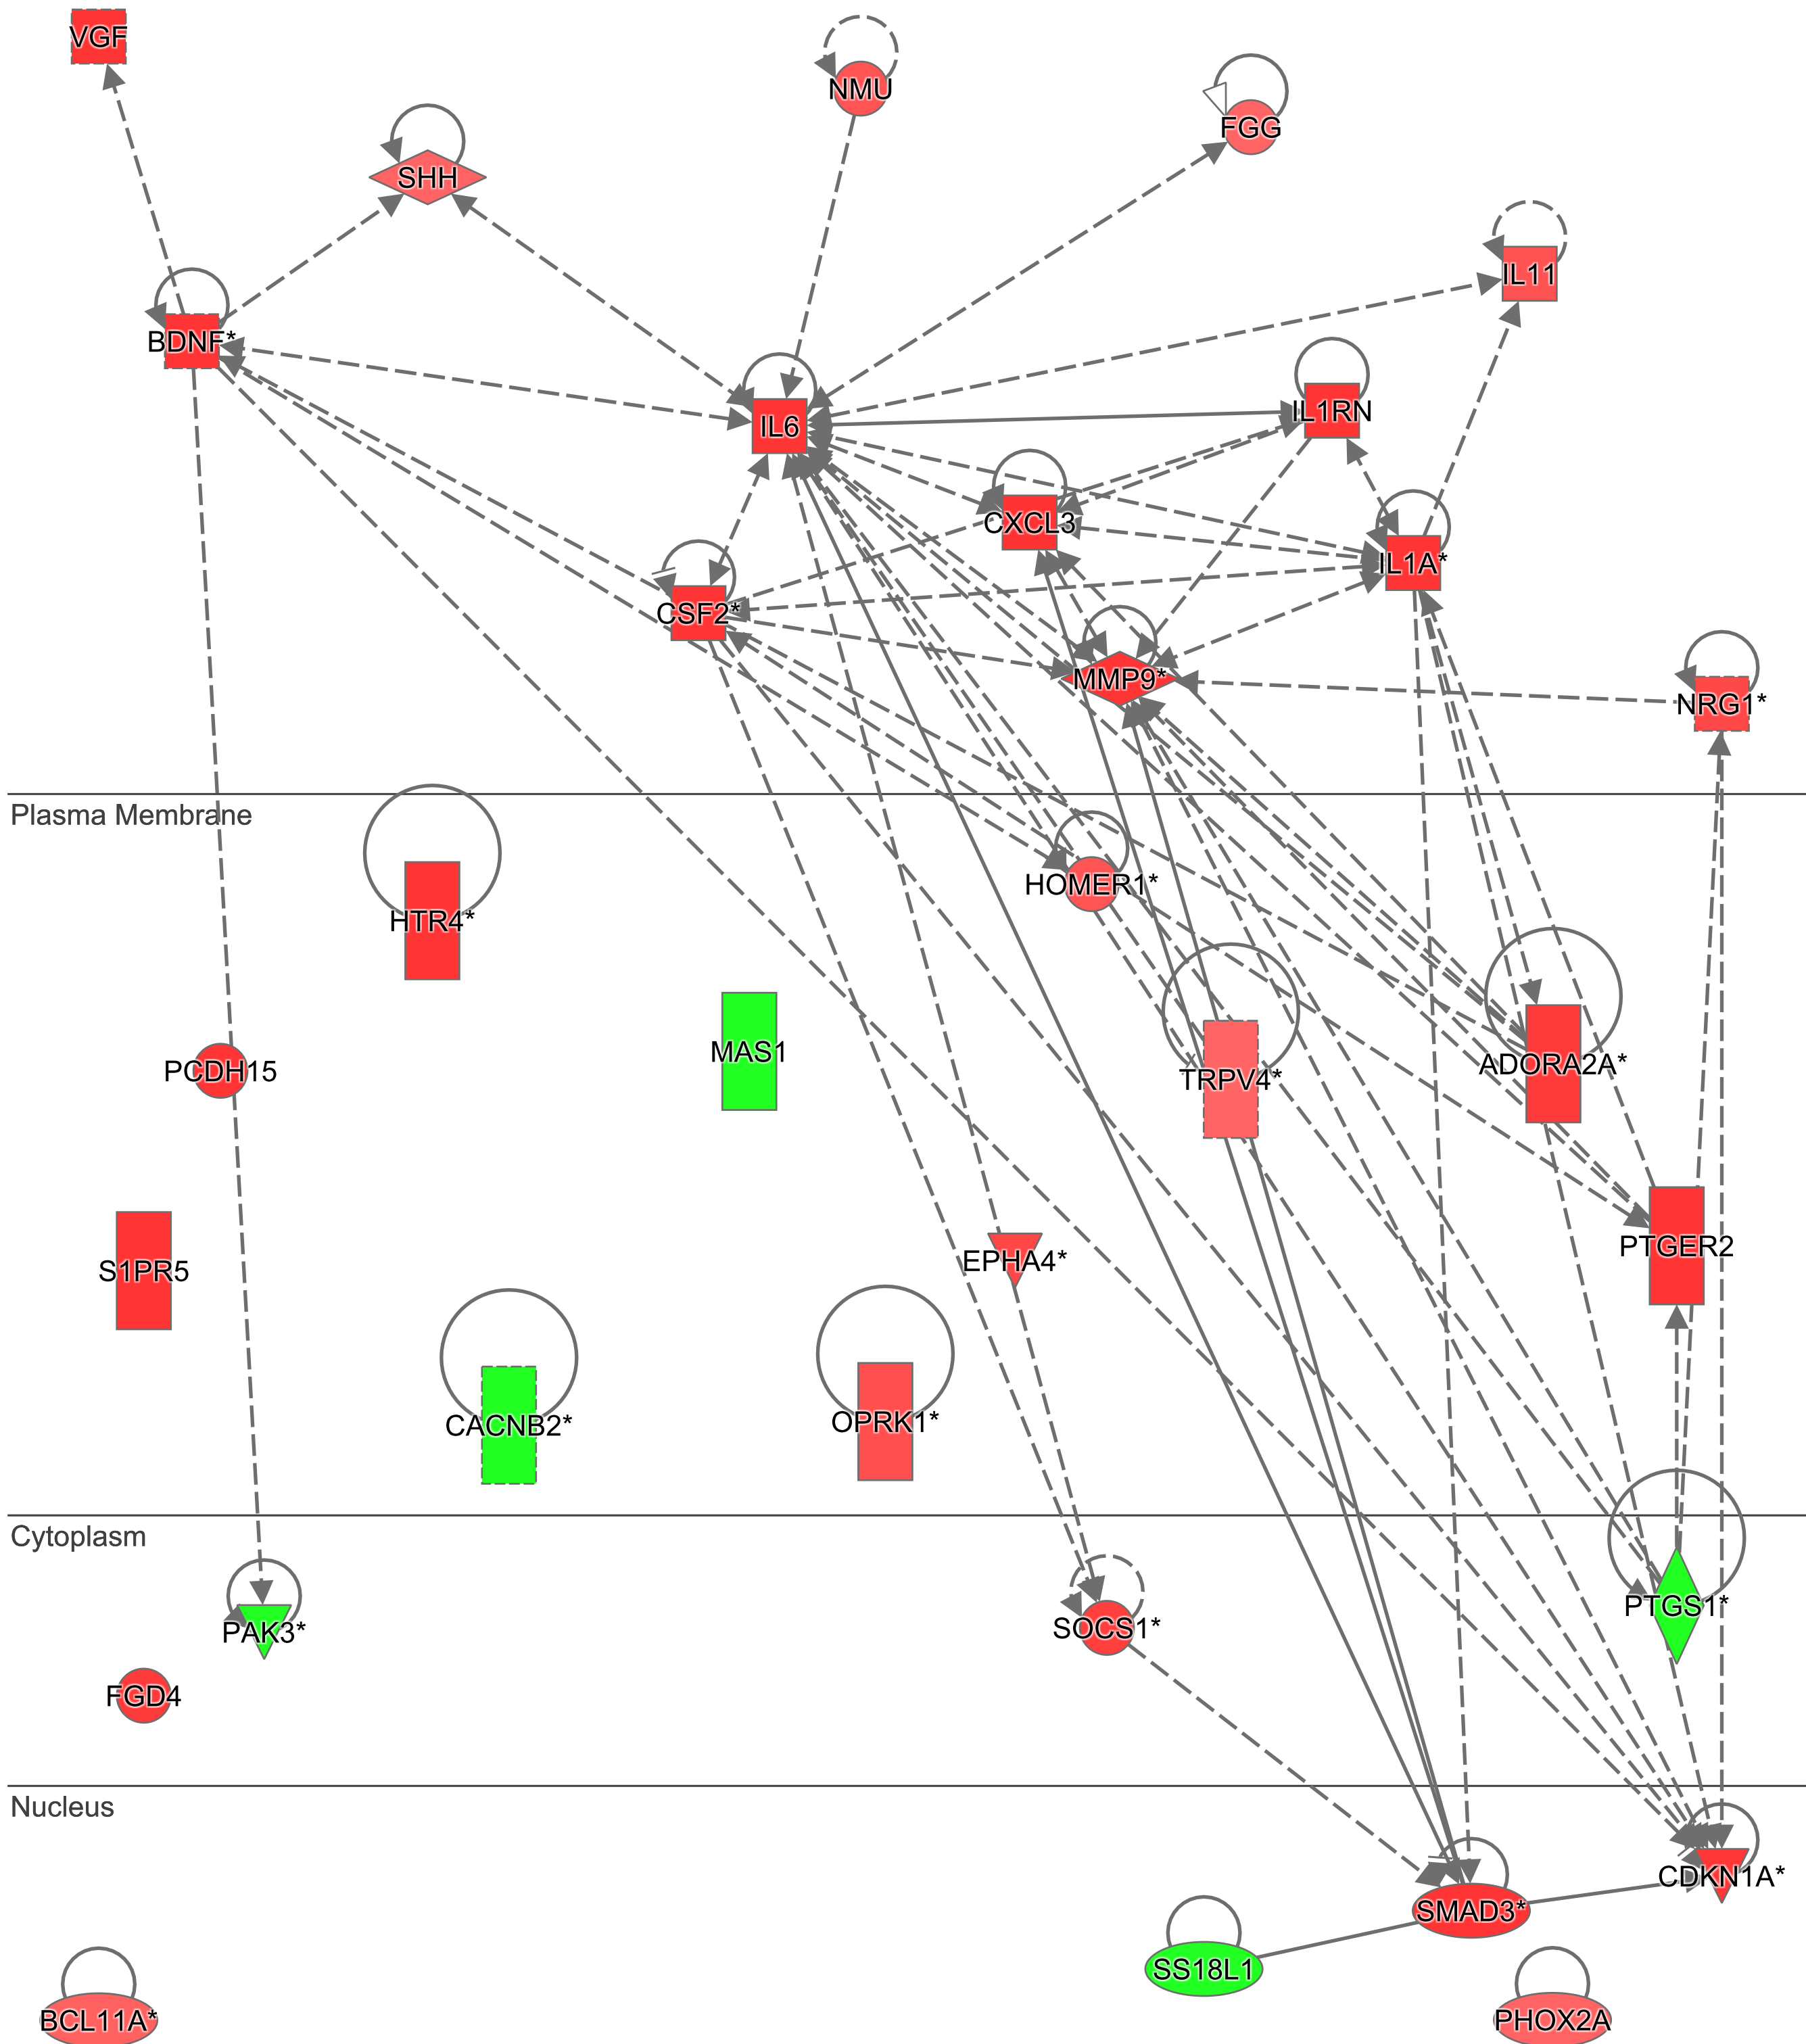

12 hours

Extracellular Space

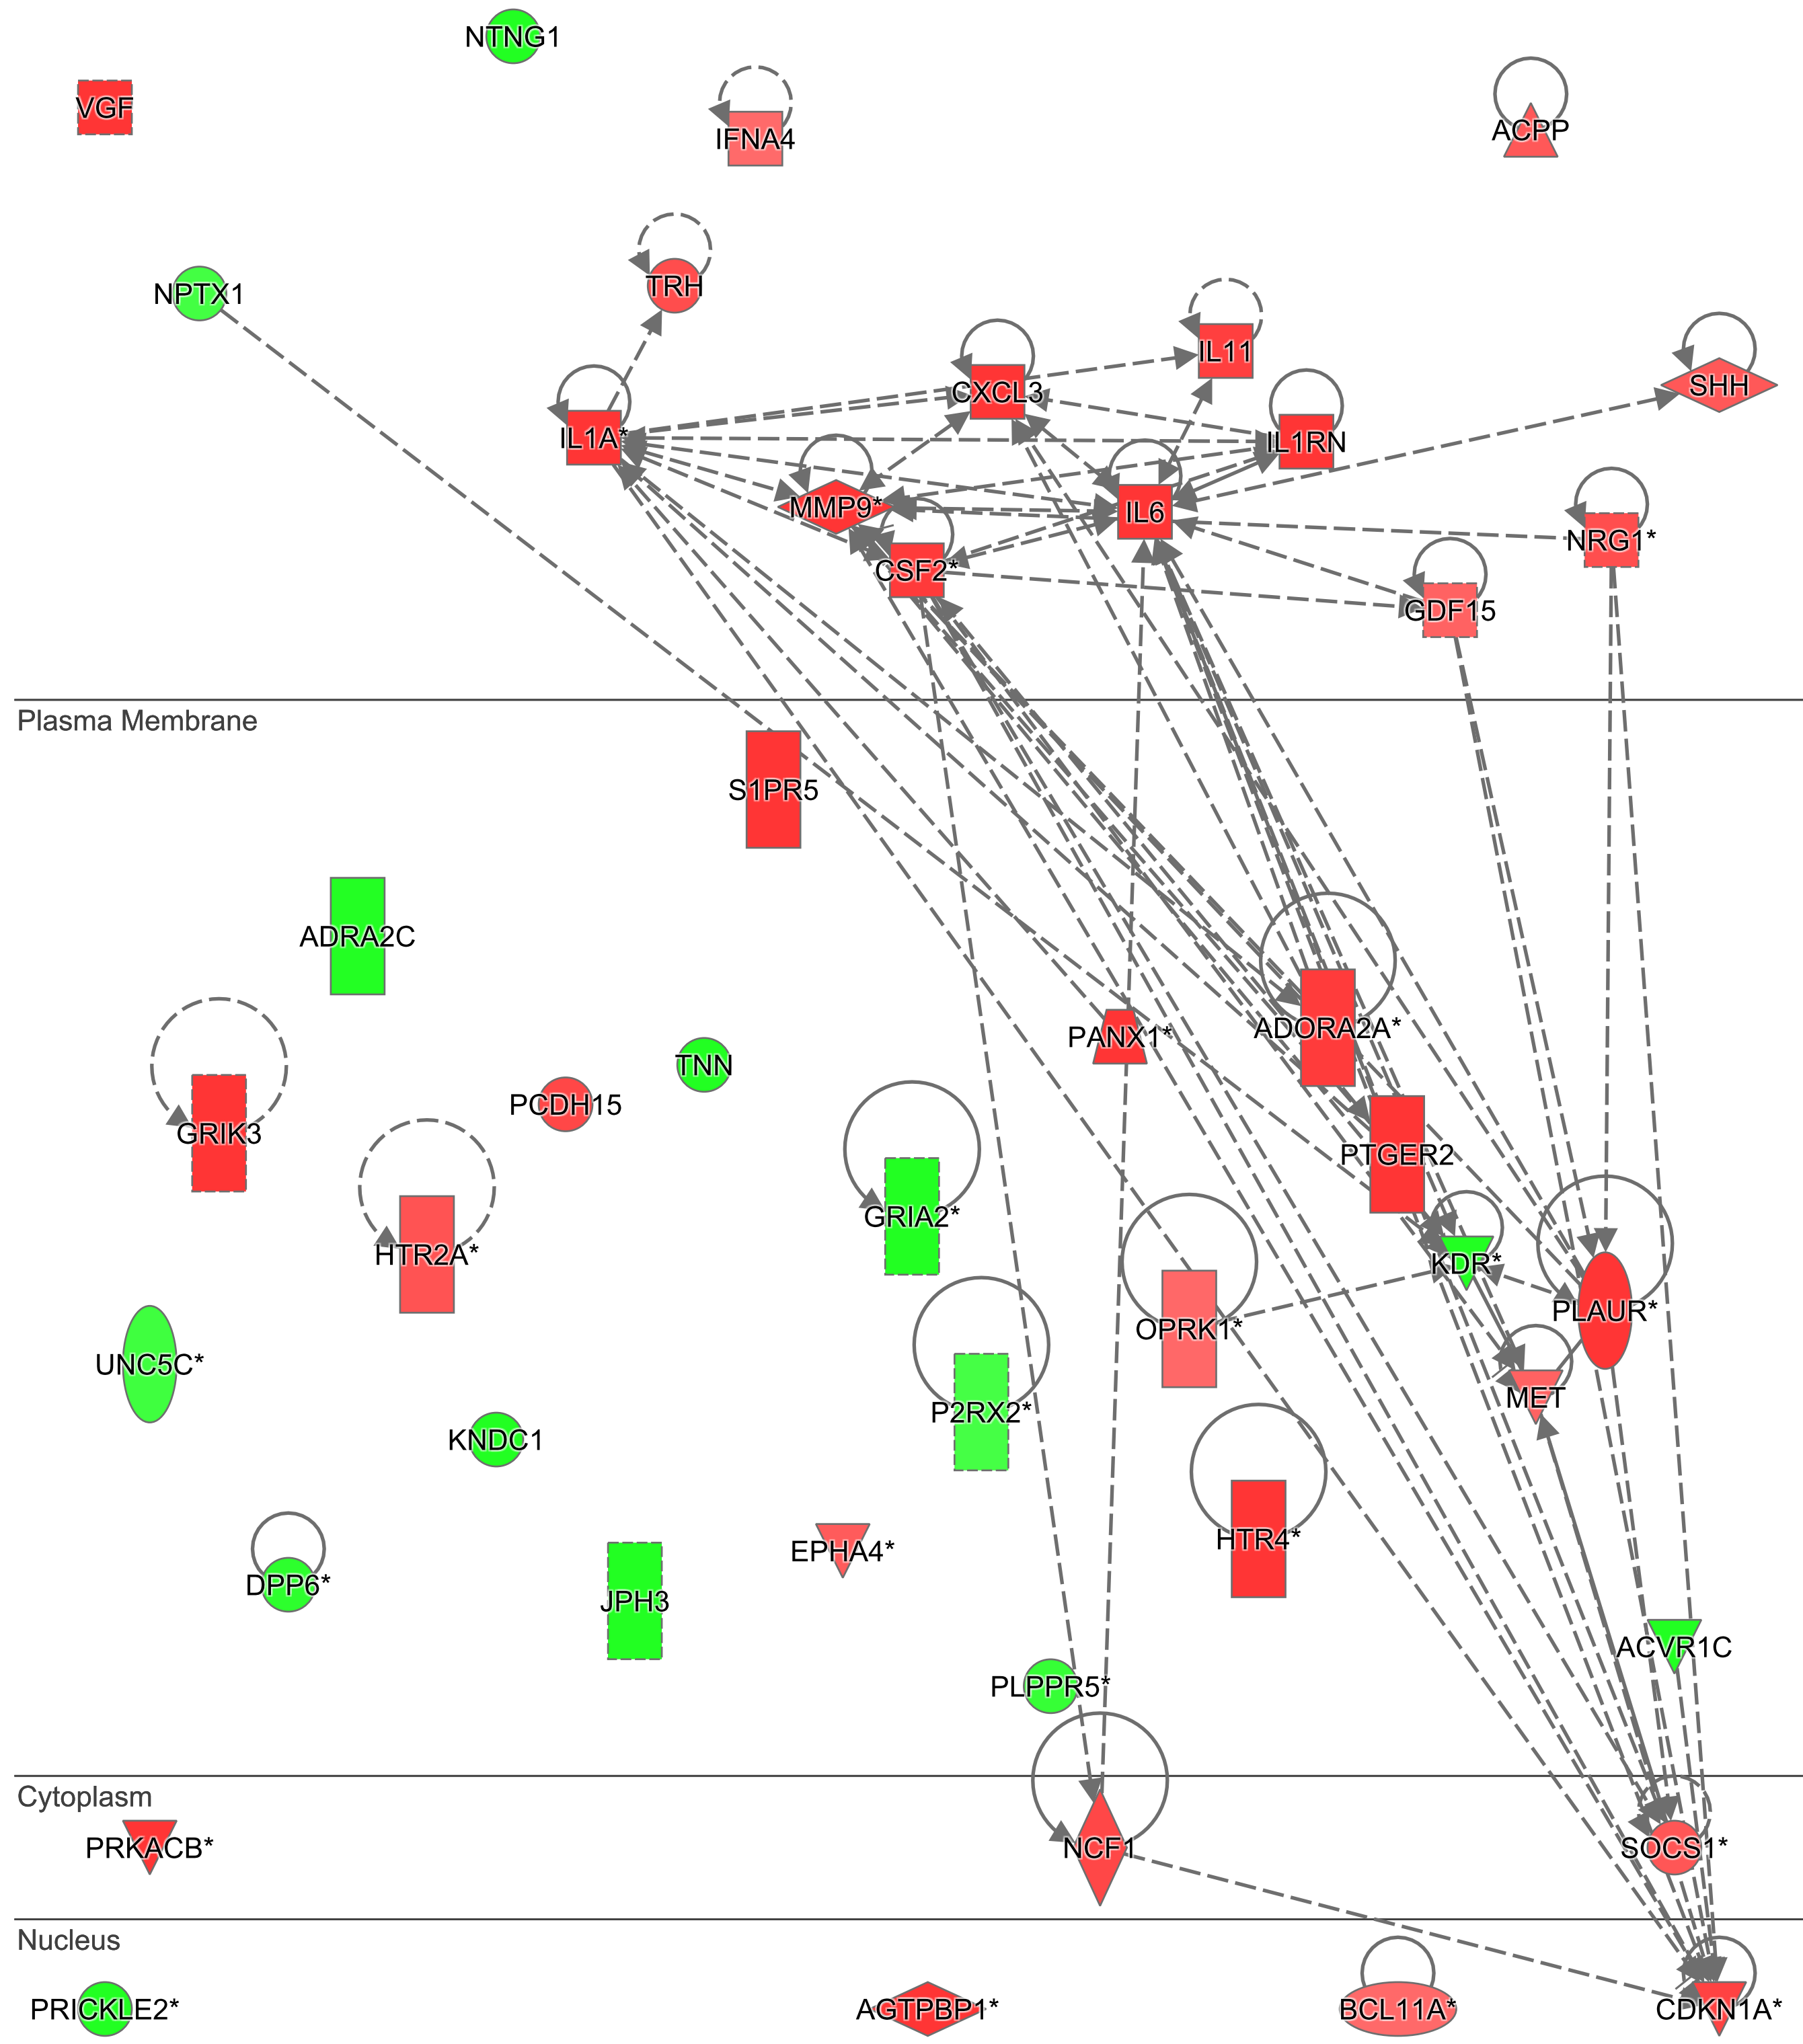

24 hours

Extracellular Space

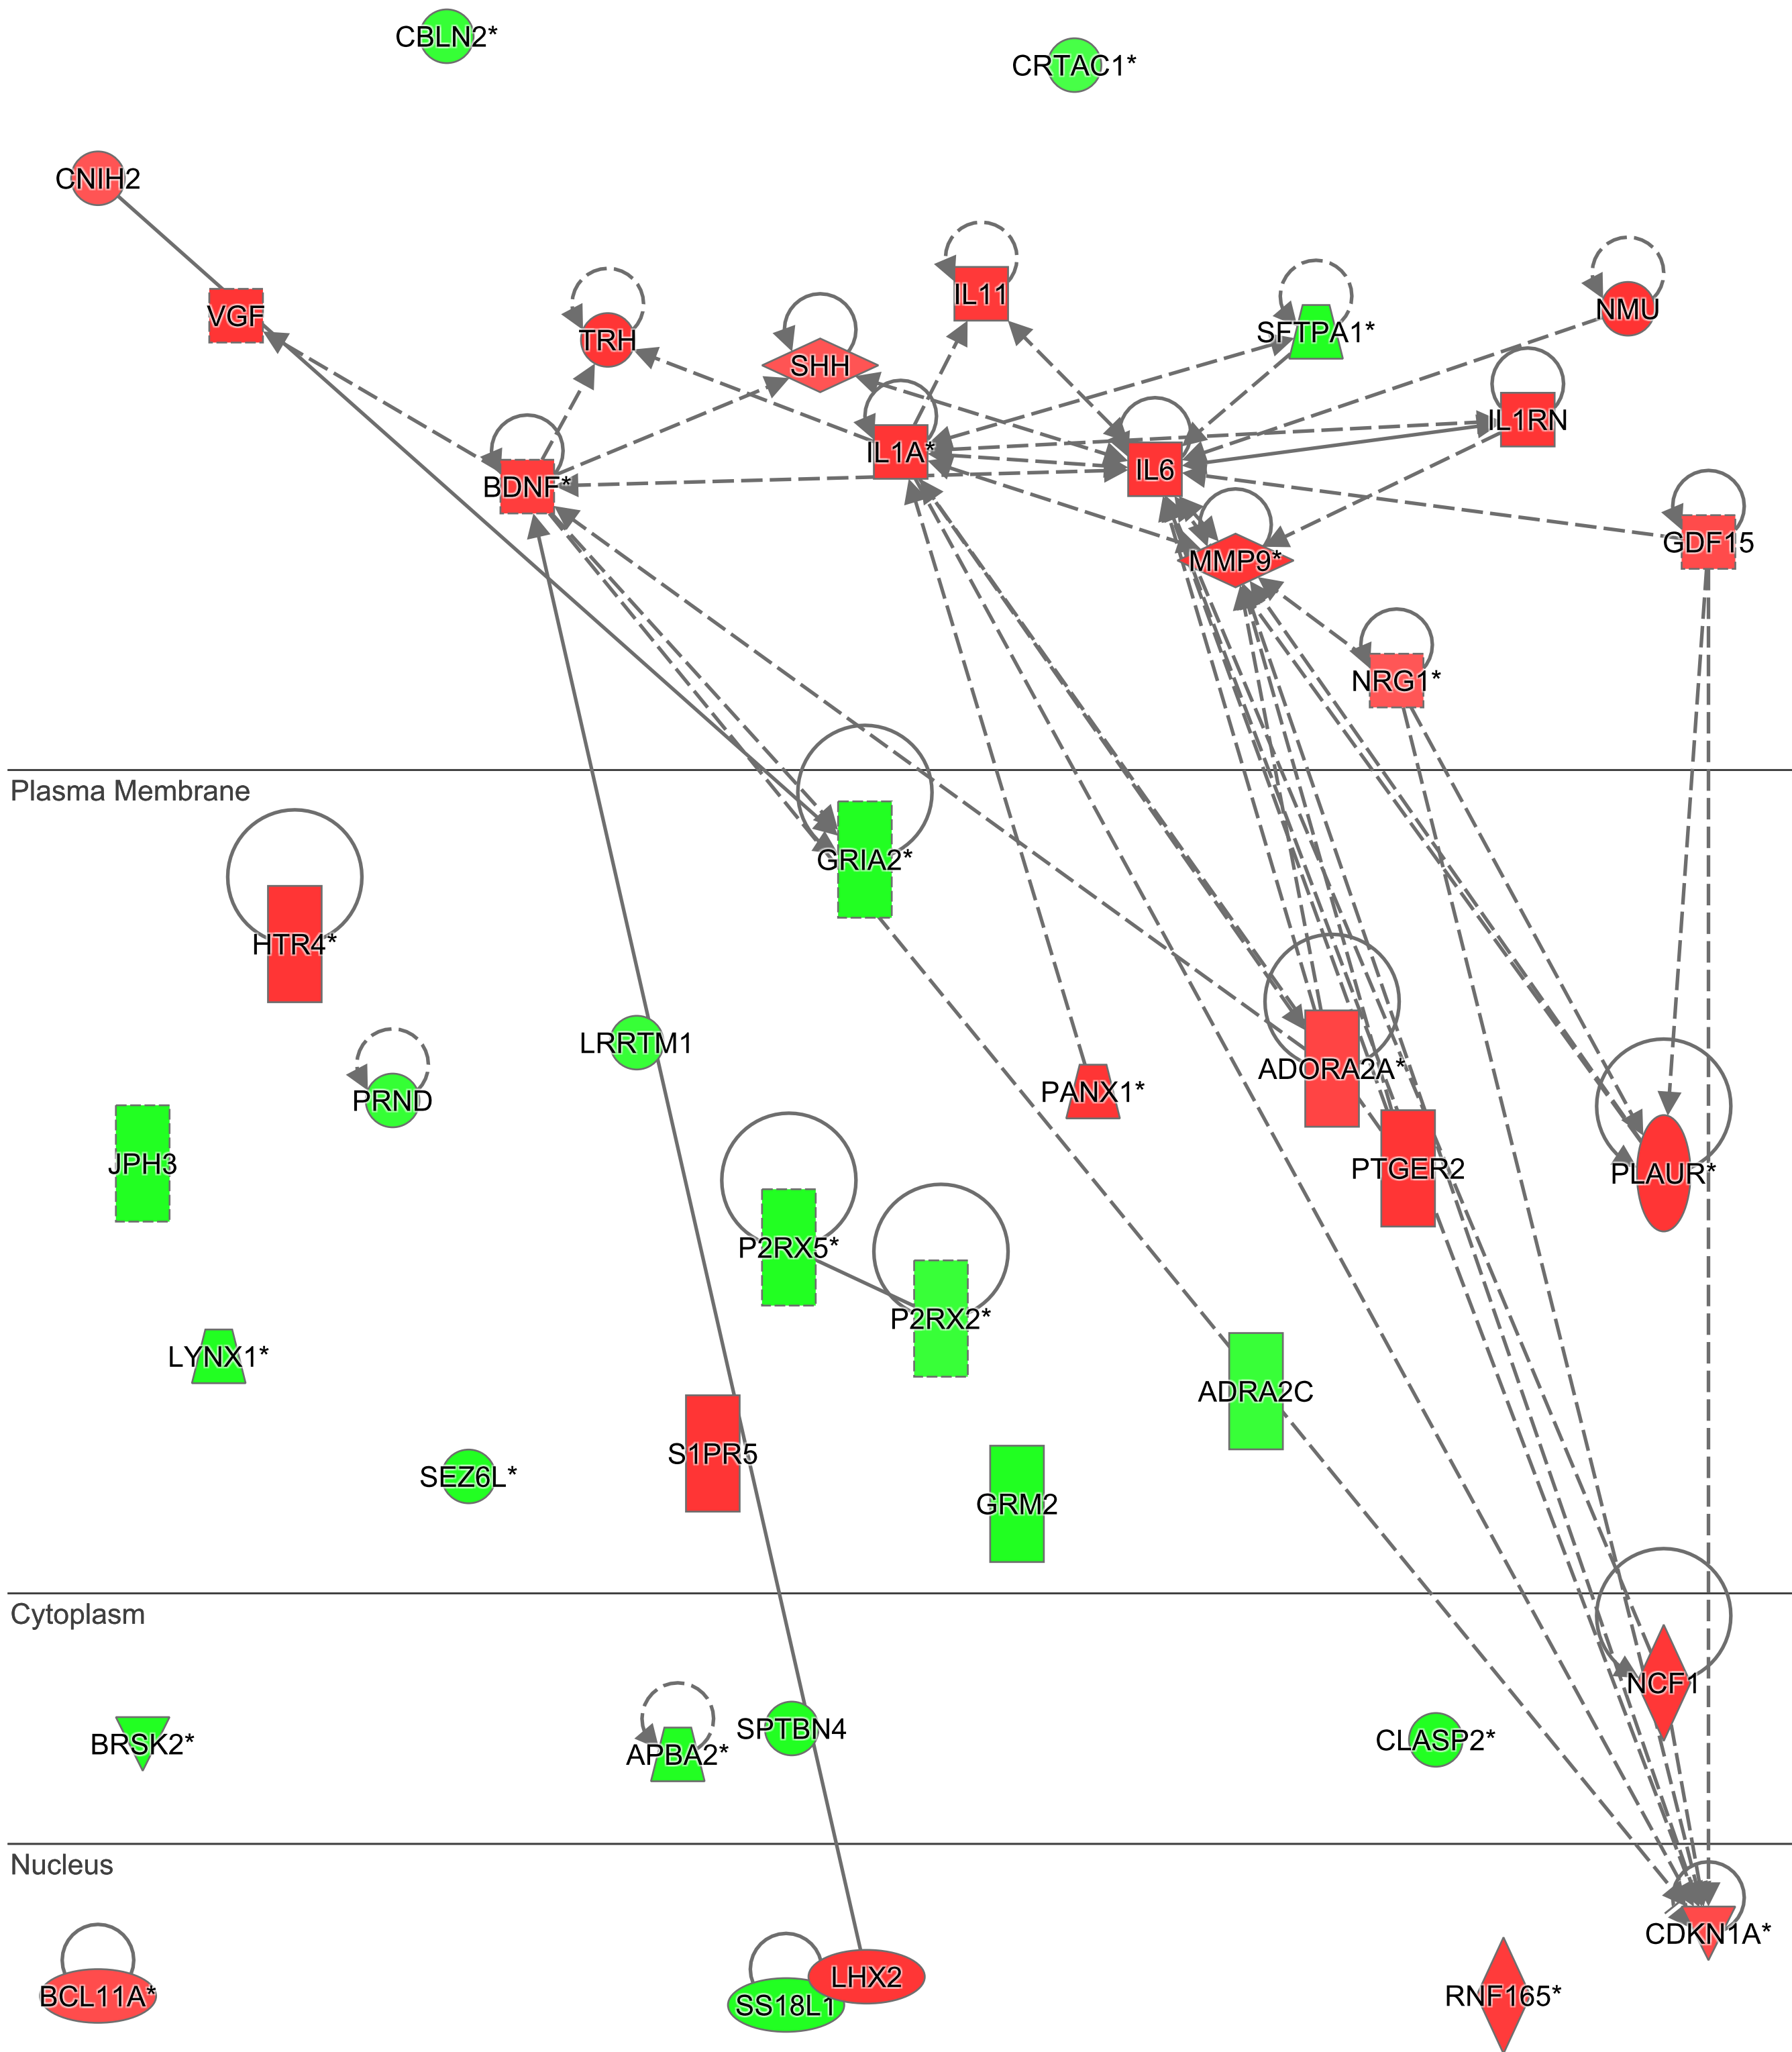

4 days

Extracellular Space

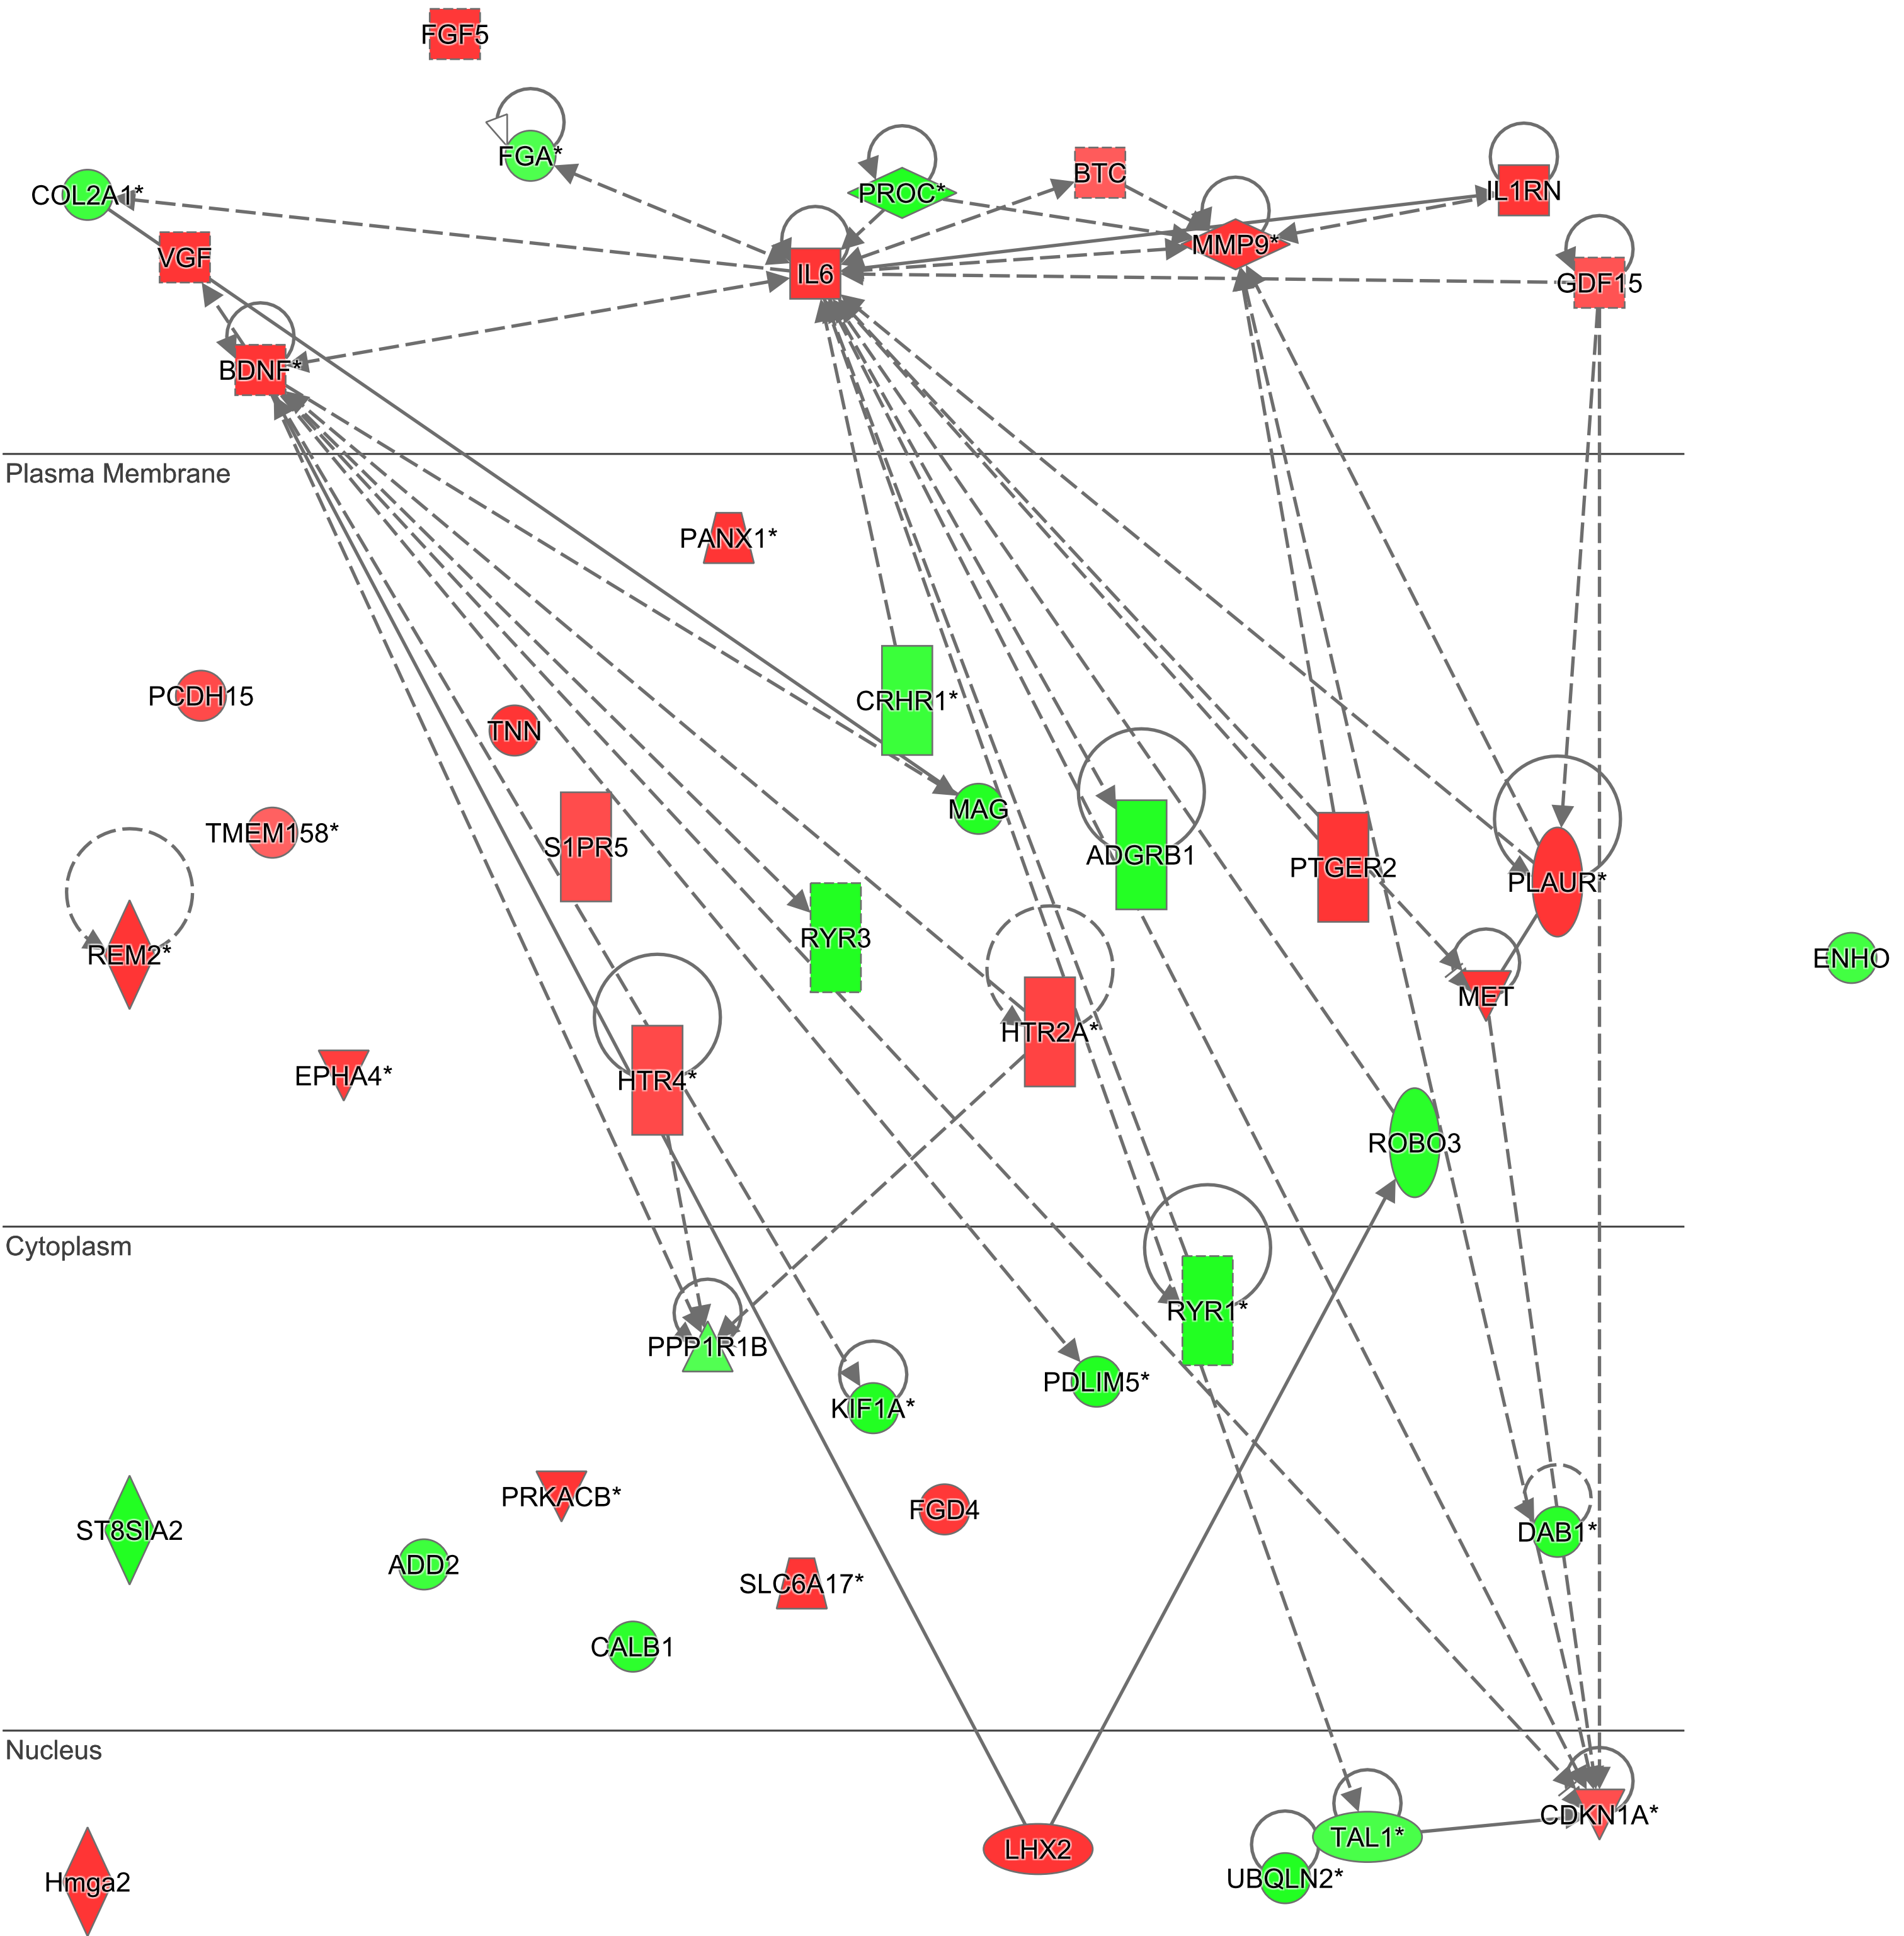

1 week

Extracellular Space

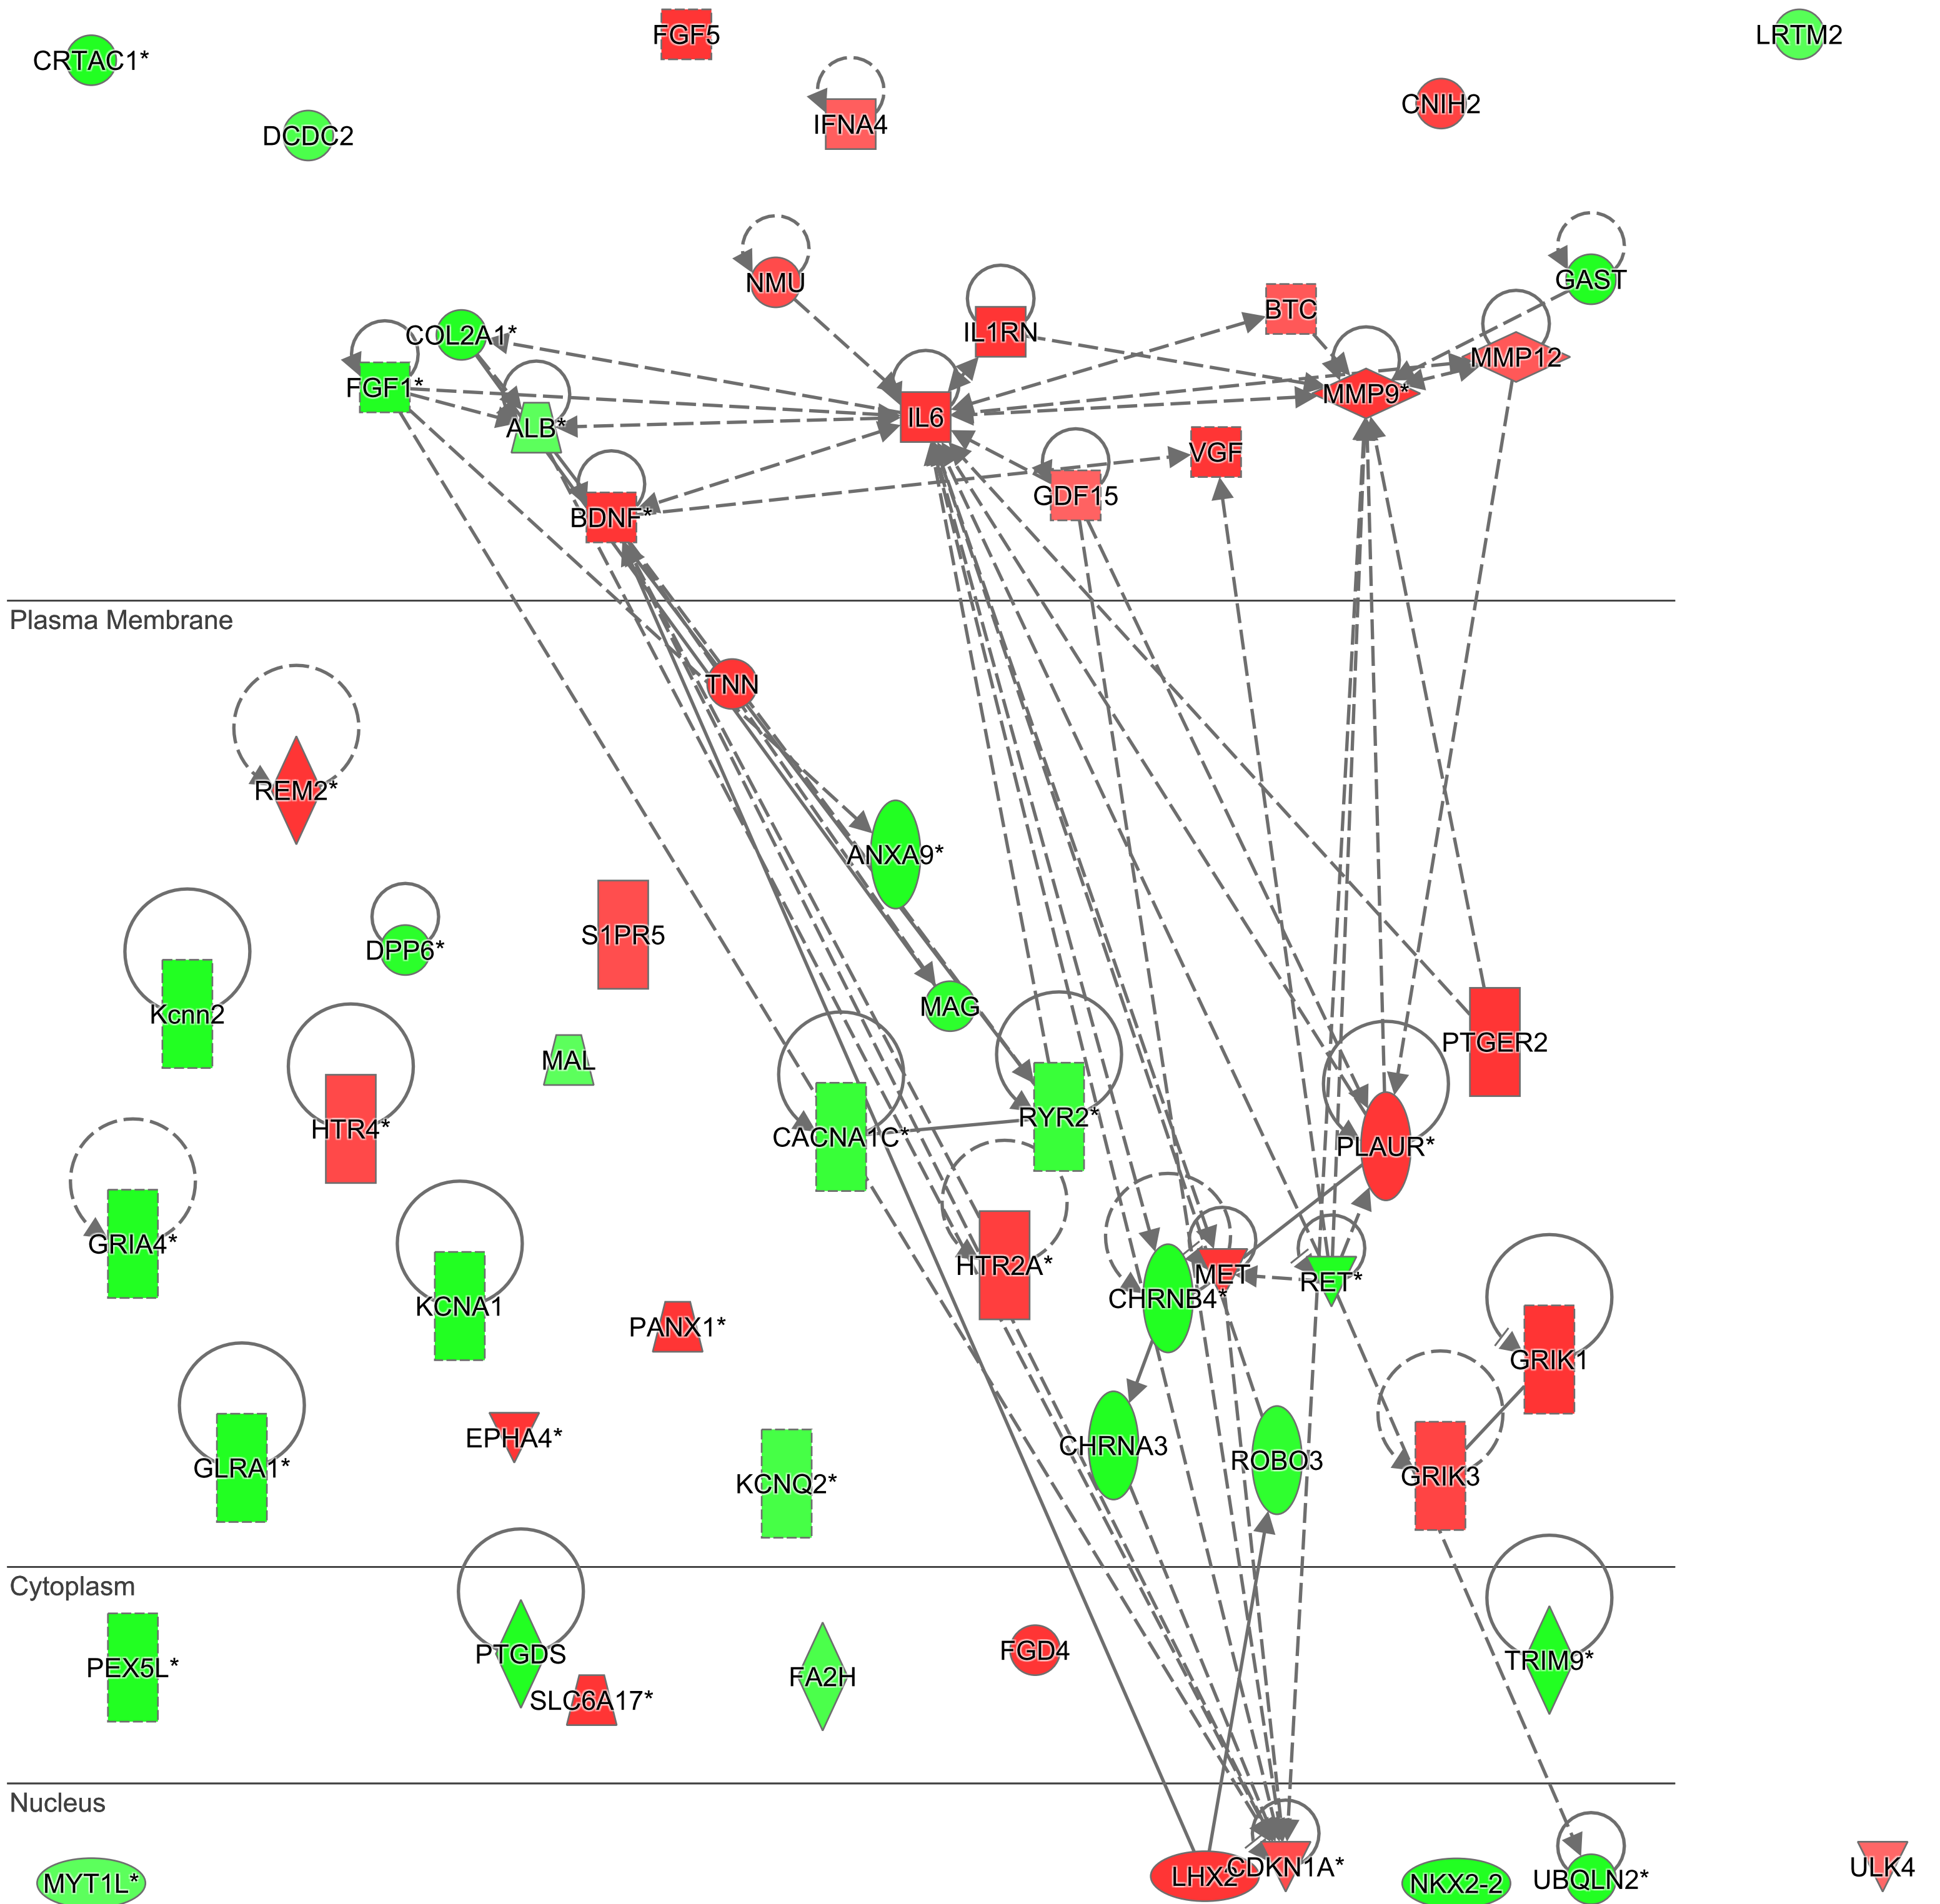

2 weeks

Extracellular Space

Plasma Membrane

Cytoplasm

Nucleus

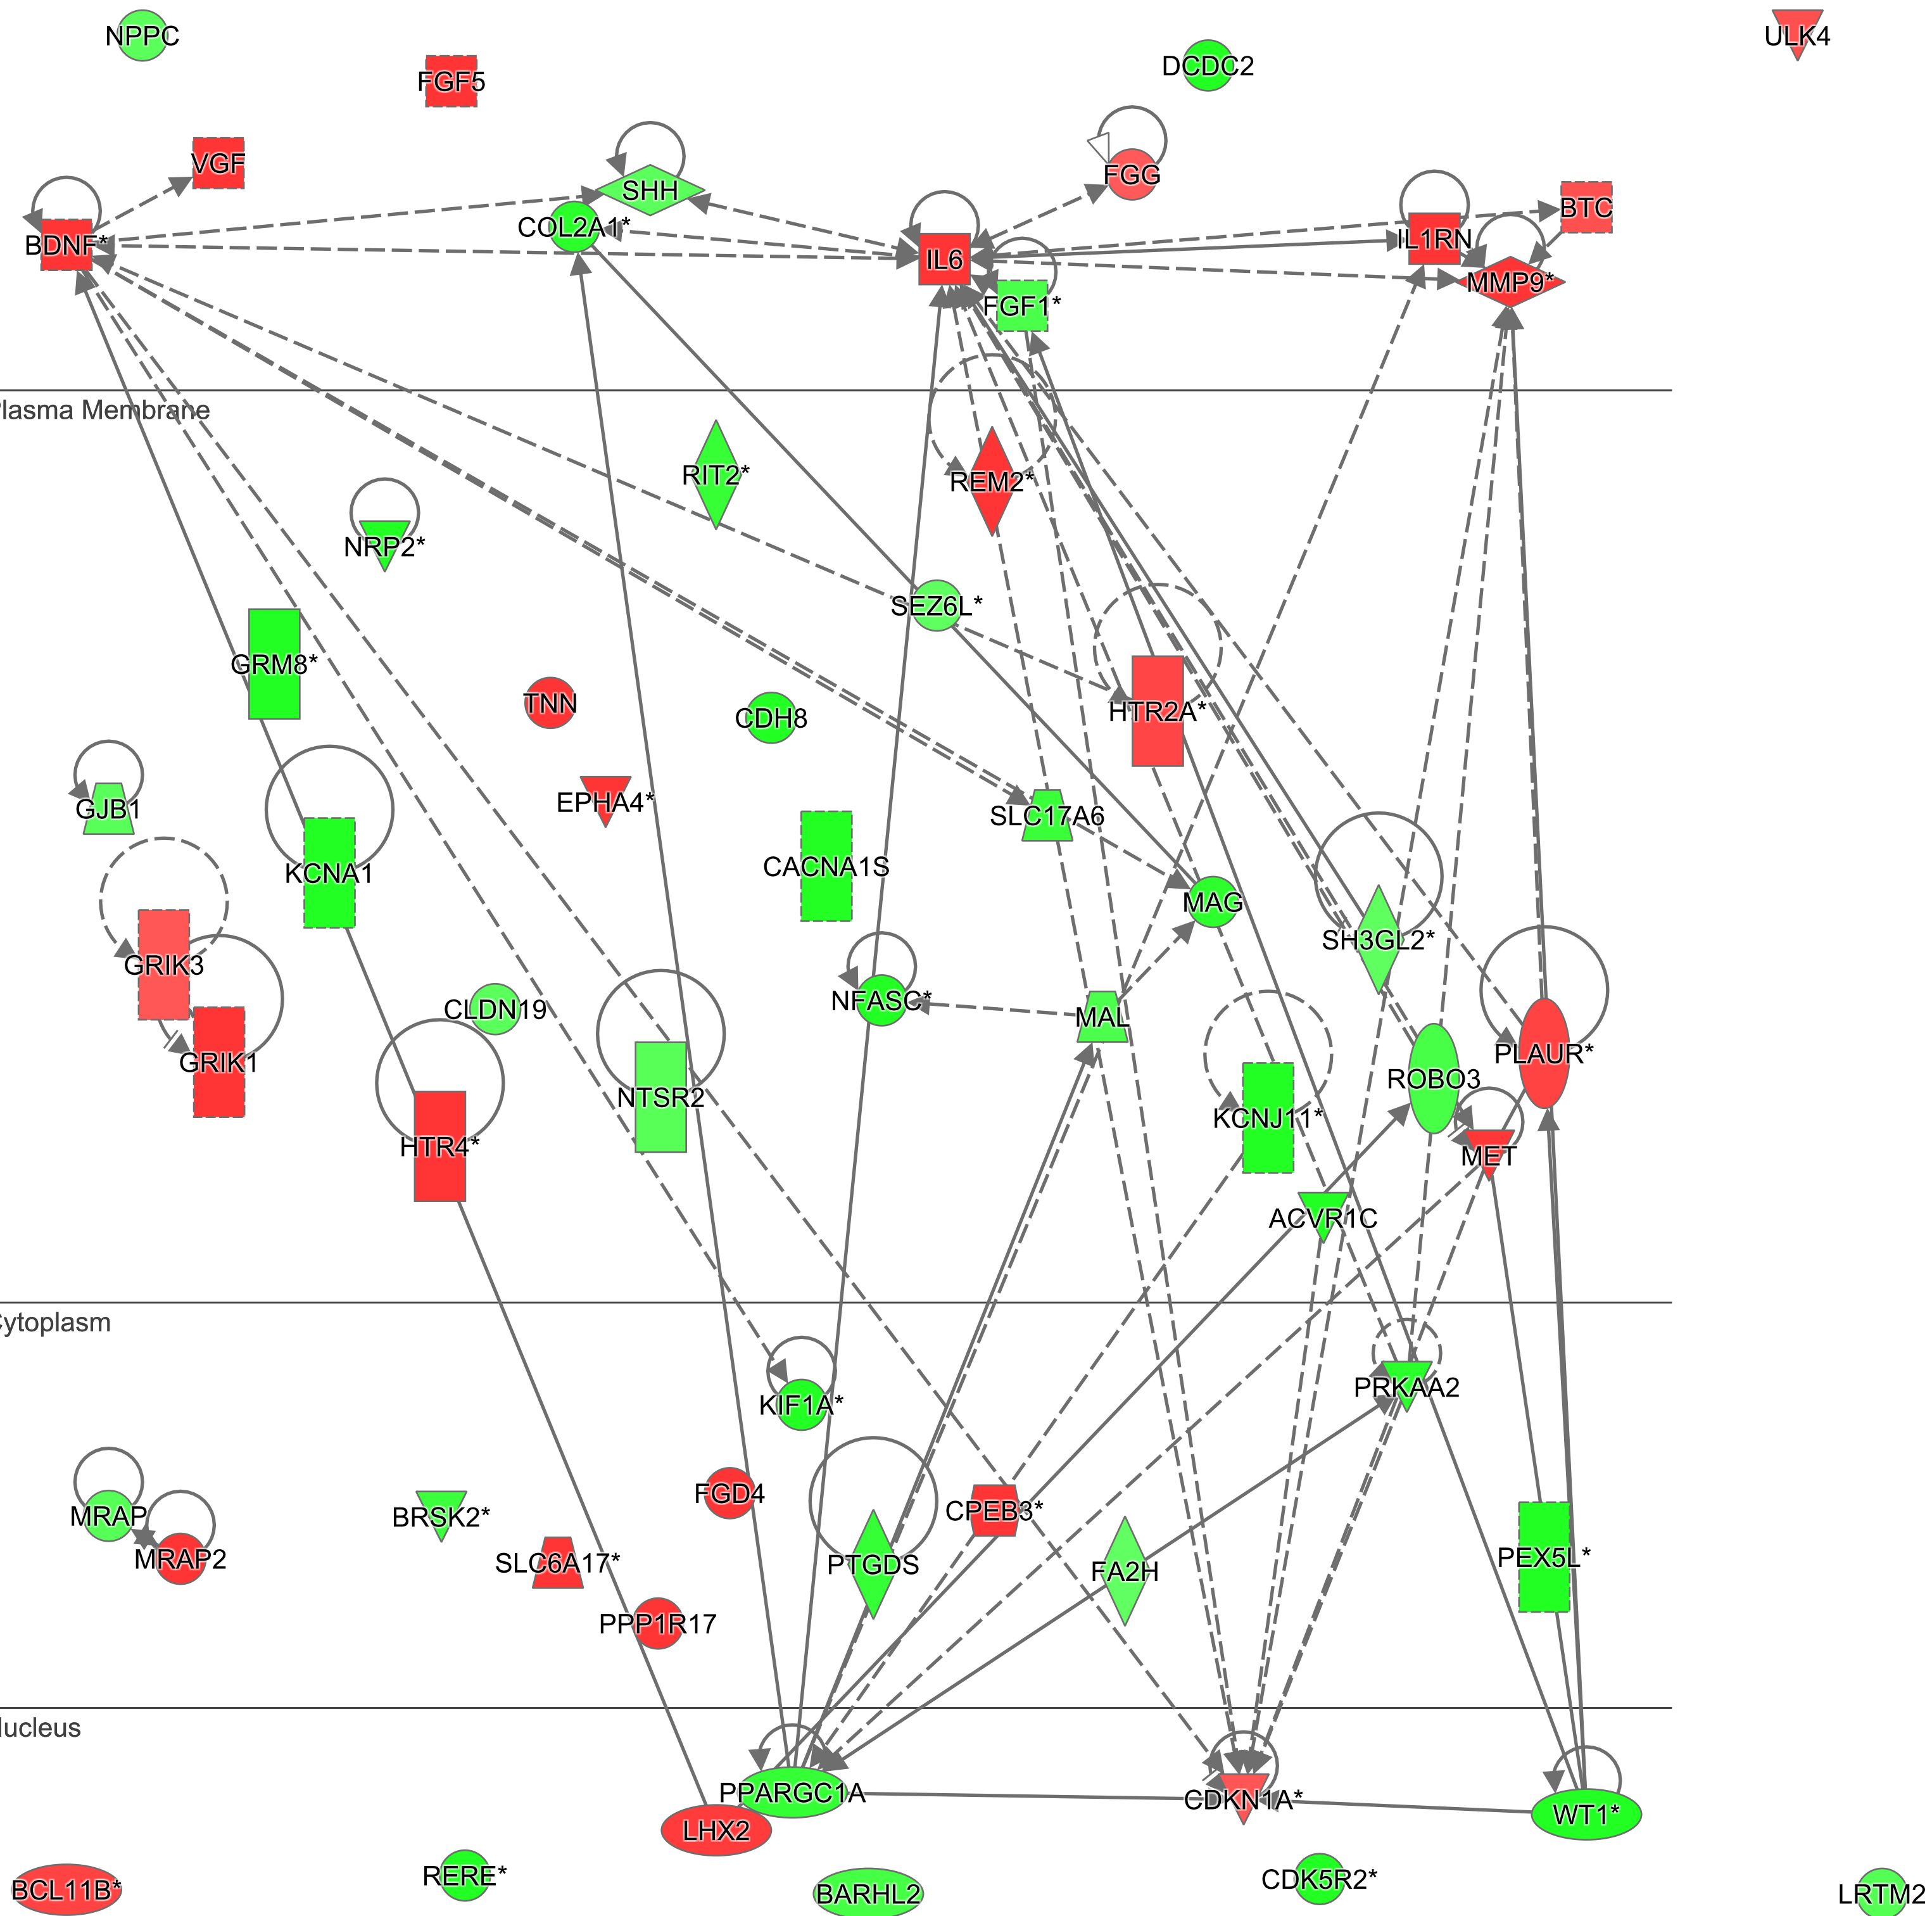



3 weeks

Extracellular Space

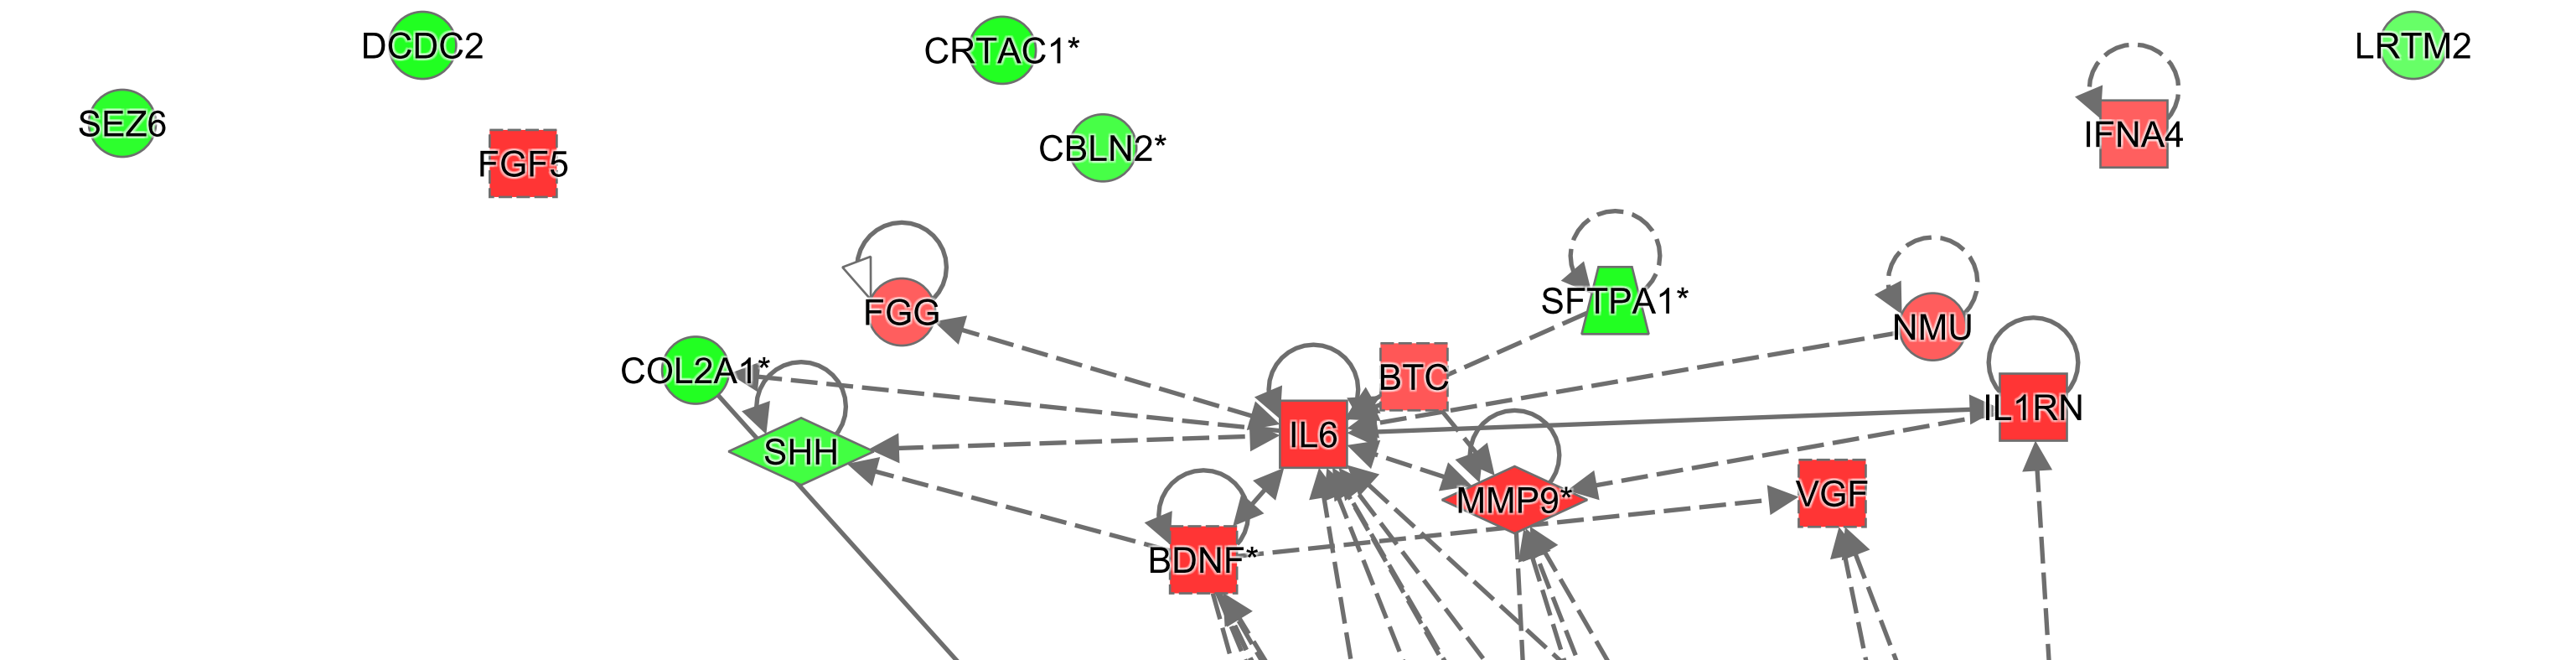

Plasma Membrane

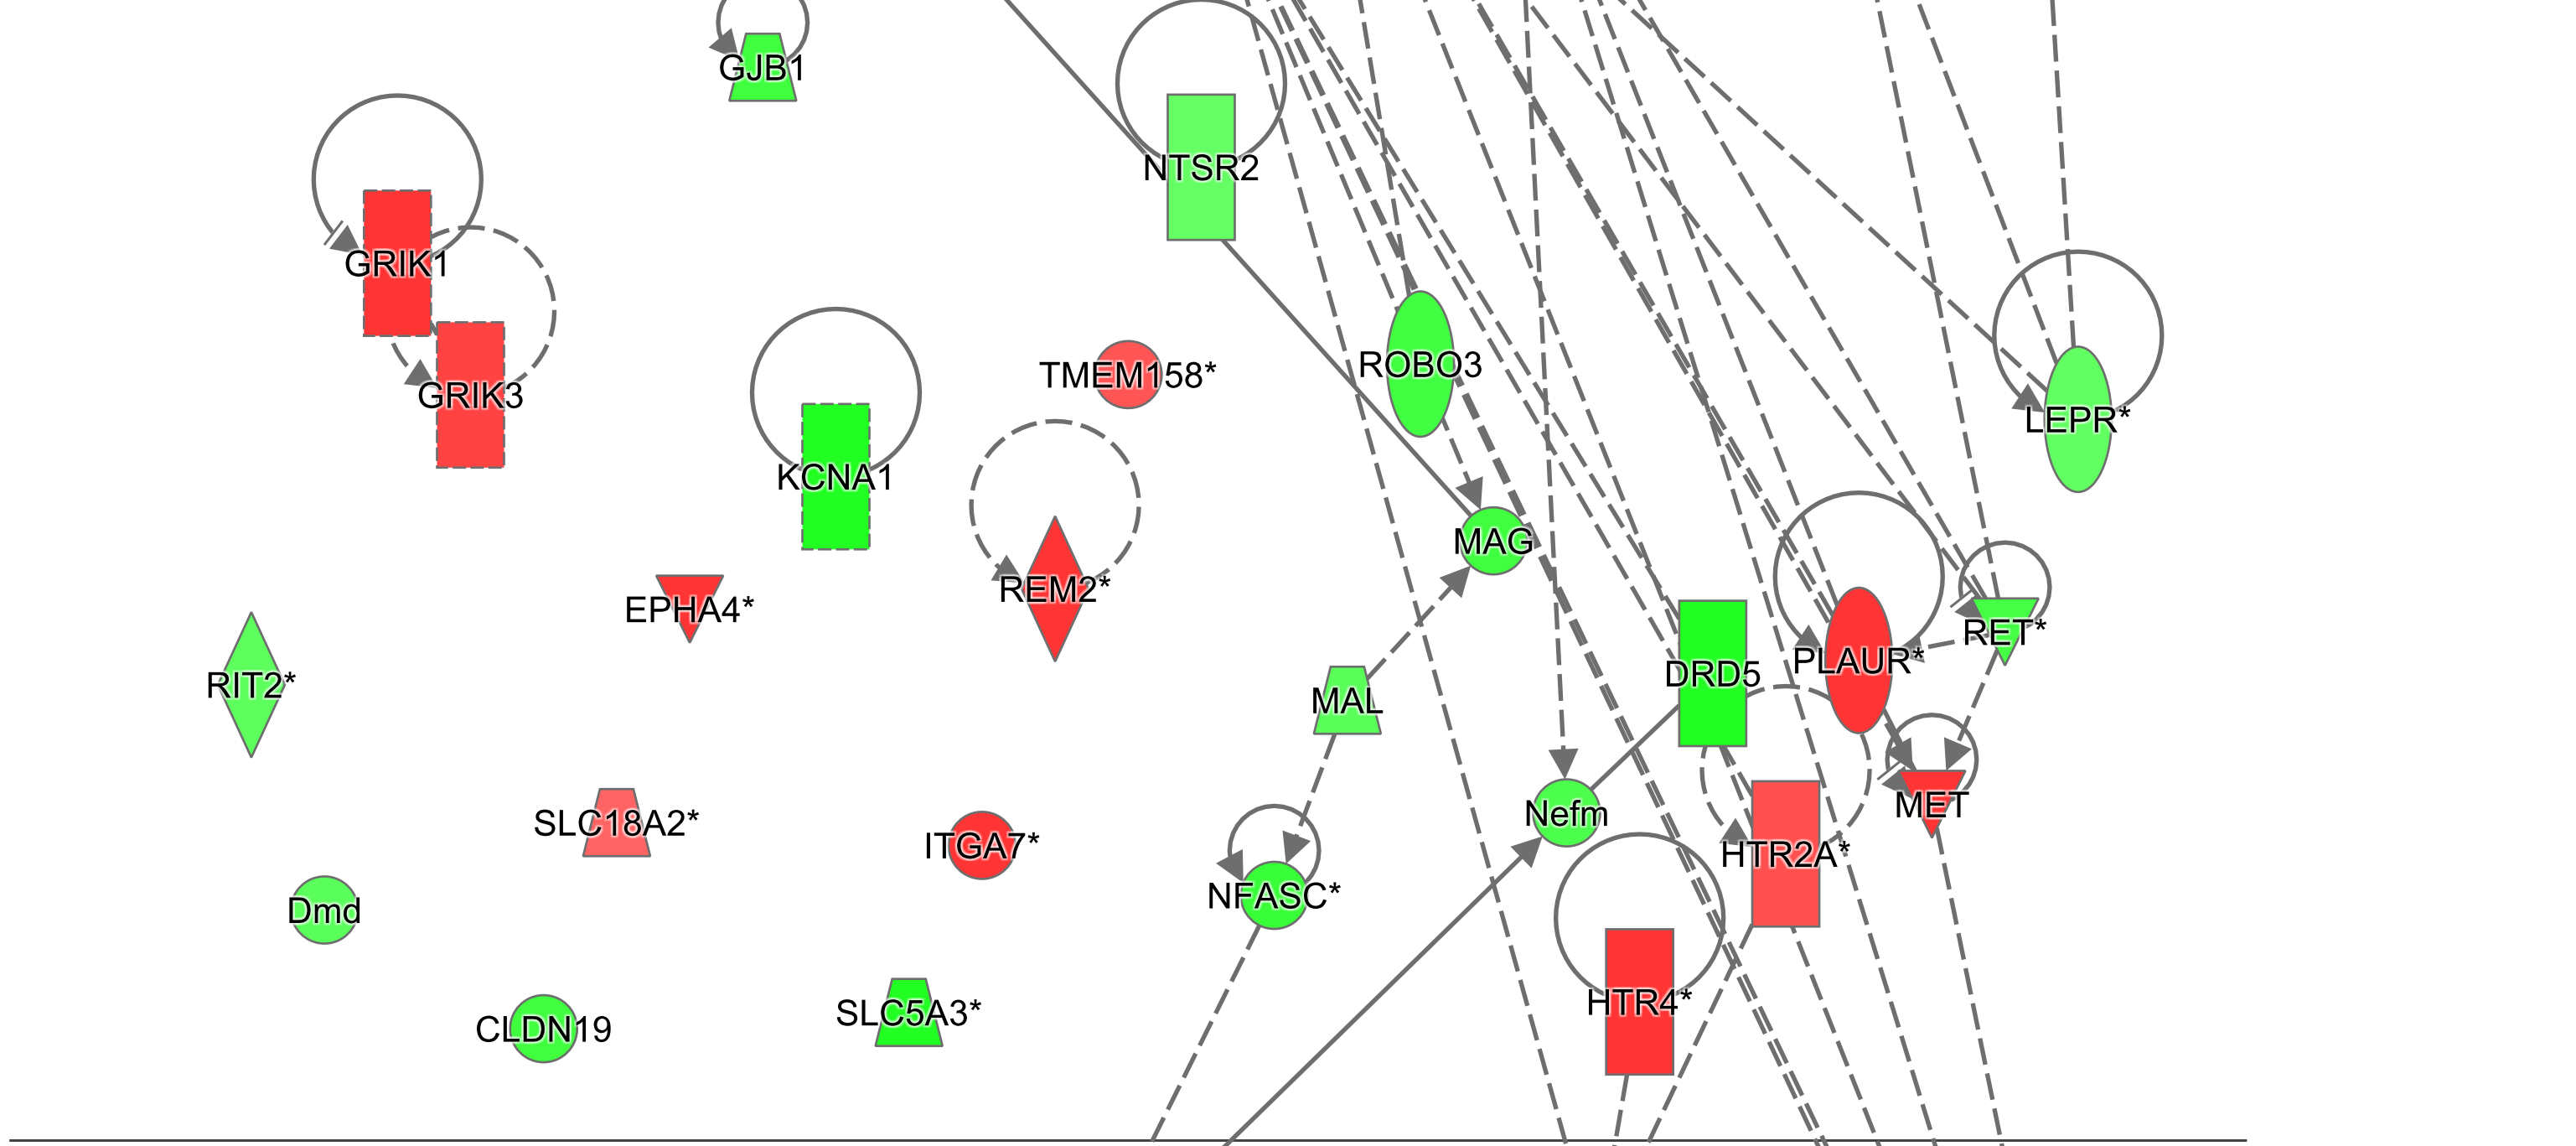

Cytoplasm

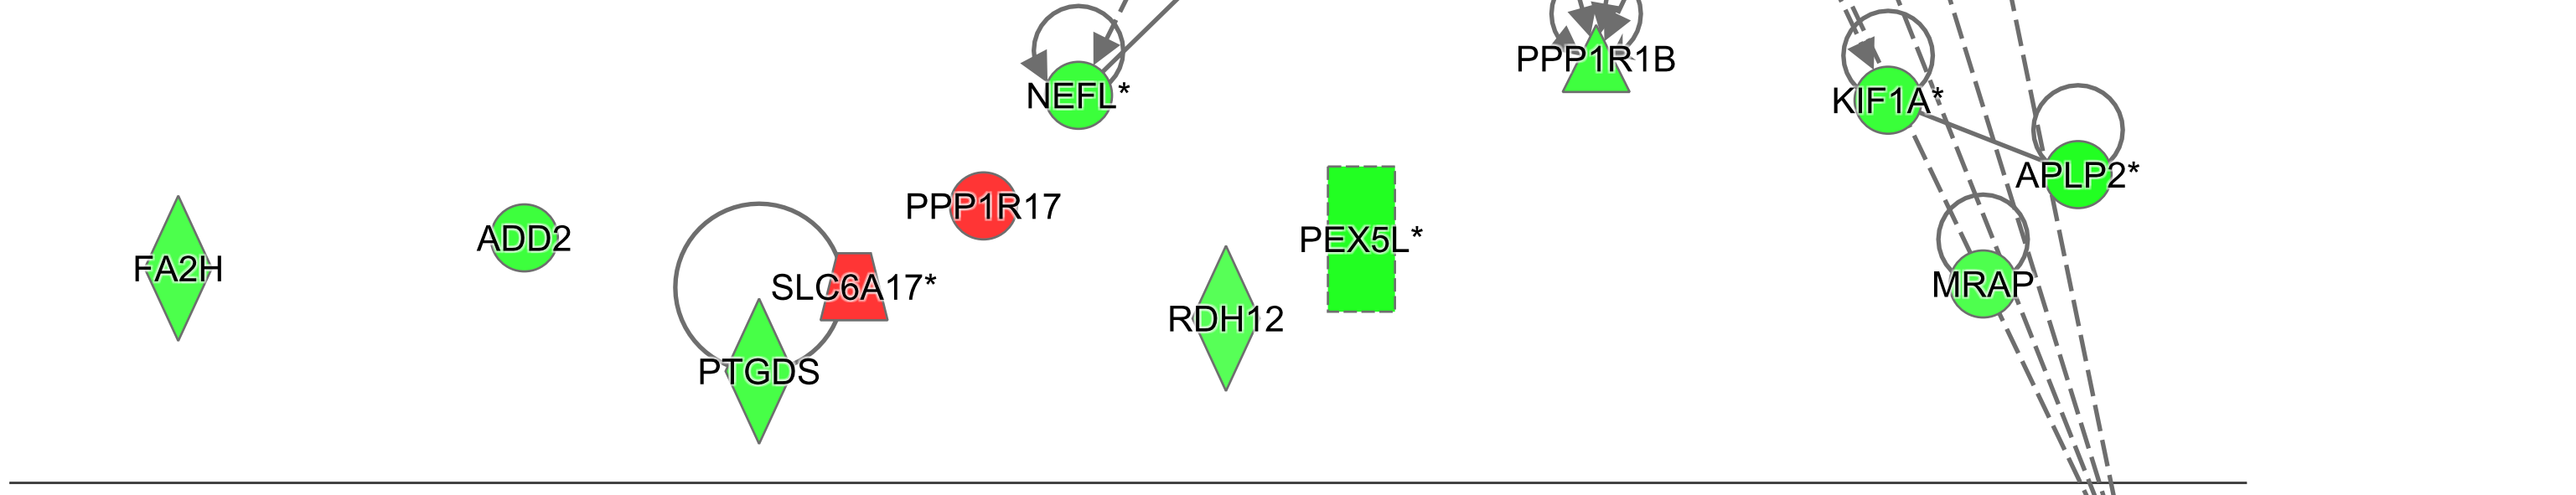

Nucleus

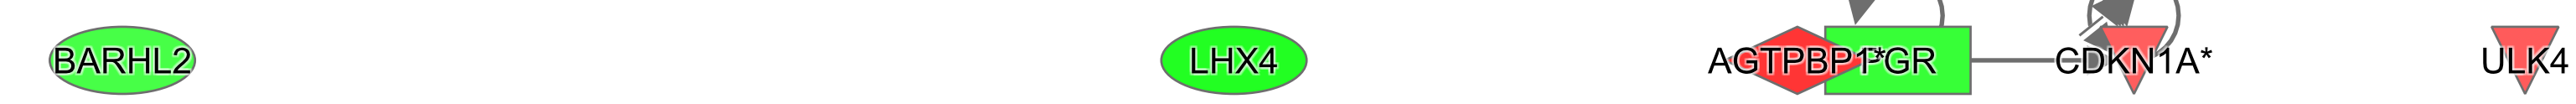

Supplement: Image1.pdf [file Image1.pdf]
